# Supplementary material for: Efficacy and Safety of Fixed-Dose Artesunate-Amodiaquine vs. Artemether-Lumefantrine for Repeated Treatment of Uncomplicated Malaria in Ugandan Children
Source: PubMed Central journal article supplement (PMC4249977; doi:10.1371/journal.pone.0113311), 2014-12-01
Supplement: pone.0113311.s002.pdf [file pone.0113311.s002.pdf]

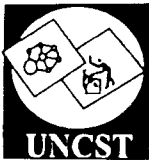

# Uganda National Council For Science and Technology

(Established by Act of Parliament of the Republic of Uganda)

Your Ref:.....

Our Ref:..... **HS 415**

Date:.....**10/04/08**.....

Dr. Ambrose Otau Talisuna  
Assistant Commissioner Health Services  
Epidemiological Surveillance Division  
Ministry of Health  
Kampala

Dear Dr. Talisuna,

**RE: RESEARCH PROJECT APPROVAL AND CLEARANCE**

This is to inform you that on **March 19, 2008** the Uganda National Council for Science and Technology (UNCST) approved the research proposal entitled, "**A RANDOMIZED STUDY TO COMPARE A FIXED DOSE COMBINATION OF ARTESUNATE PLUS AMODIAQUINE VESUS A FIXED DOSE COMBINATION OF ARTHEMETHER PLUS LUMENFANTRINE IN TREATMENT OF REPEATED UNCOMPLICATED PLASMODIUM FALCIPARUM MALARIA ATTACKS OCCURRING DURING 2 YEARS OF FOLLOW-UP, IN CHILDREN IN UGANDA**". The approval is valid until **March 19, 2009**. If it is necessary to continue with the research project beyond the expiry date, a request for continuation should be made in writing, and a progress report should be provided, to the Executive Secretary, UNCST.

Any problems of a serious nature related to the execution of your research project should be brought to the attention of the UNCST, and any changes to the research protocol should not be implemented without UNCST's approval except when necessary to eliminate apparent immediate hazards to the research participant(s).

This letter also serves as proof of UNCST approval and as a reminder for you to submit to UNCST timely progress reports and a final report on completion of the research project.

Please, note that you are required to obtain a certificate for the importation and/or use of the study drug(s) from the National Drug Authority.

Yours sincerely,

Leah Nawegulo  
for: Executive Secretary

**UGANDA NATIONAL COUNCIL FOR SCIENCE AND TECHNOLOGY**

cc Executive Director, National Drug Authority  
cc Resident District Commissioner, Tororo District
